# Supplementary material
Source: Springer Nature journal article supplement (https://www.springermedizin.de/resource/supplementary/12986_2011_391_MOESM7_ESM.pdf/25656062)

**A**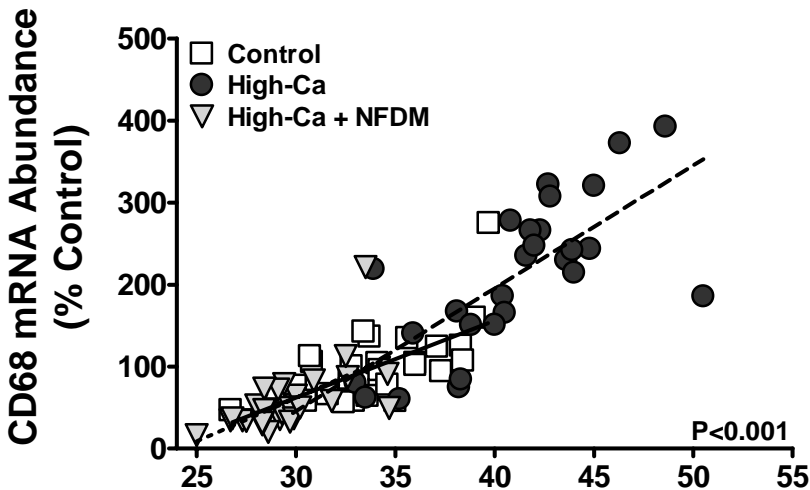

Supplement: MOESM7 [file 25656062]
